# Supplementary material
Source: PubMed Central journal article supplement (PMC2586384)

anti-PDF

anti-myc

merged

LN<sub>v</sub> Cell Bodies

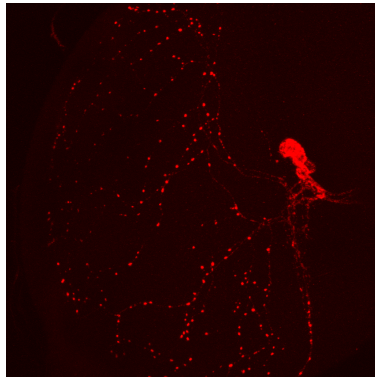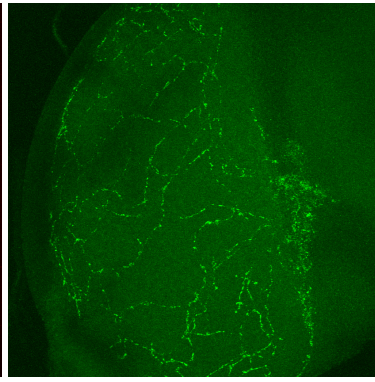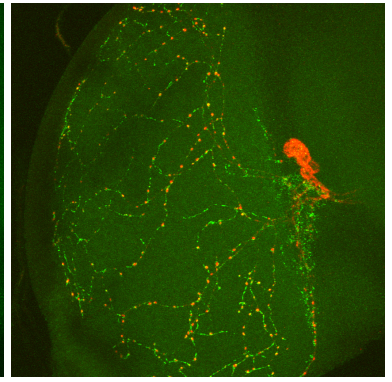

LN<sub>v</sub> Terminals

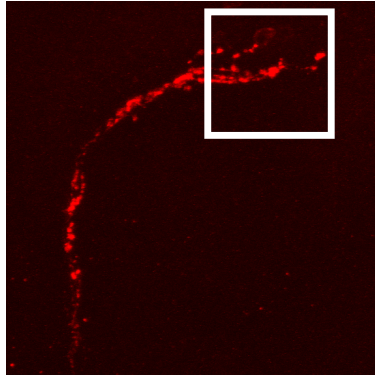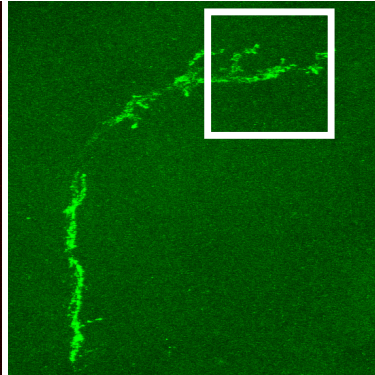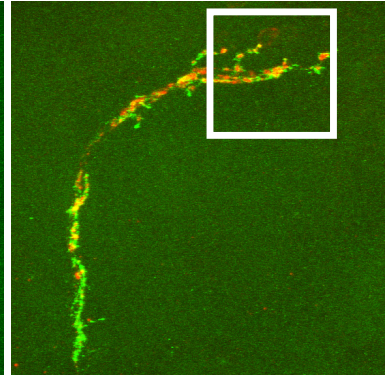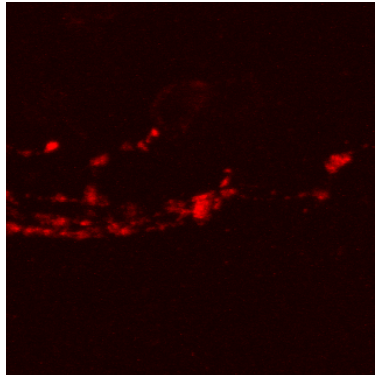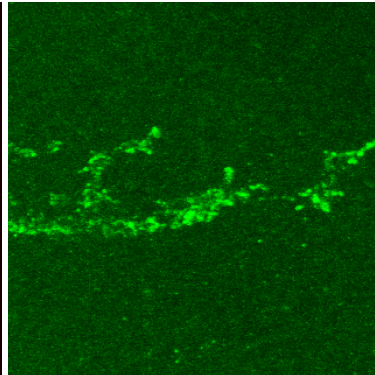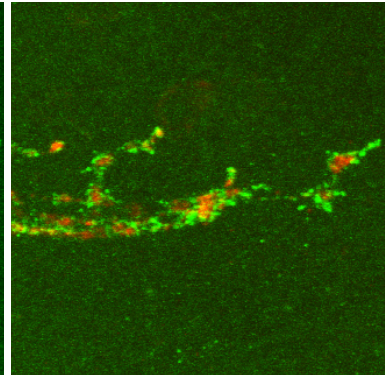

Supplement: pbio.0060273.sg001.pdf [file pbio.0060273.sg001.pdf]

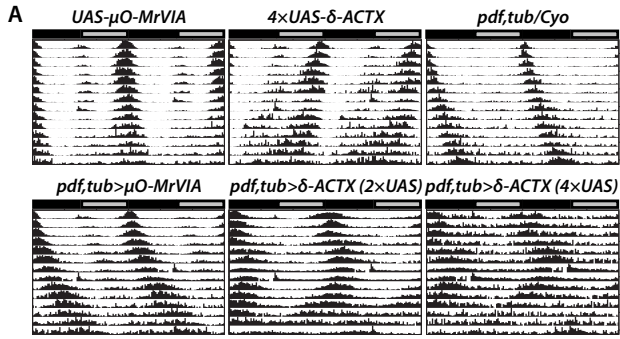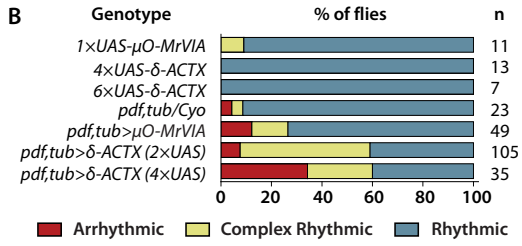

Supplement: pbio.0060273.sg002.pdf [file pbio.0060273.sg002.pdf]

**A** DN1 Staining Intensity

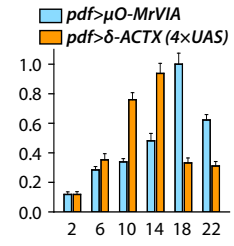

**B** DN1 Nuclei Counts

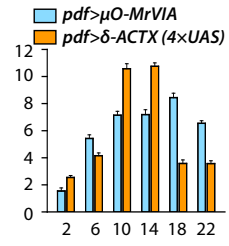

Supplement: pbio.0060273.sg003.pdf [file pbio.0060273.sg003.pdf]

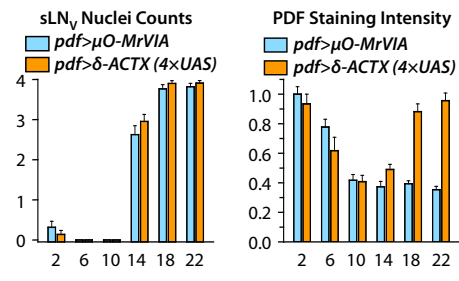

Supplement: pbio.0060273.sg004.pdf [file pbio.0060273.sg004.pdf]
